# Supplementary figures and images for: Improving pig manure compost quality and increasing bioavailability of Cd by substituting insoluble carbon with easily degradable organic carbon
Source: Research Square preprint supplement (doi:10.21203/rs.3.rs-7156454/v1), 2025-08-11

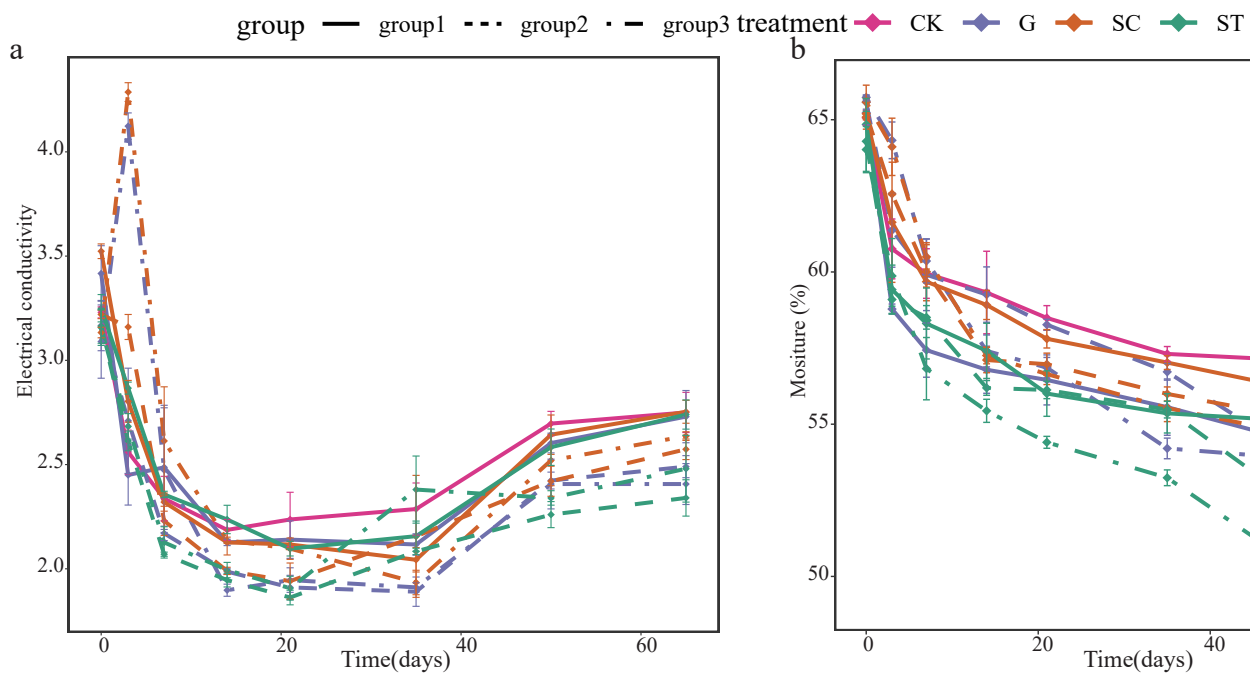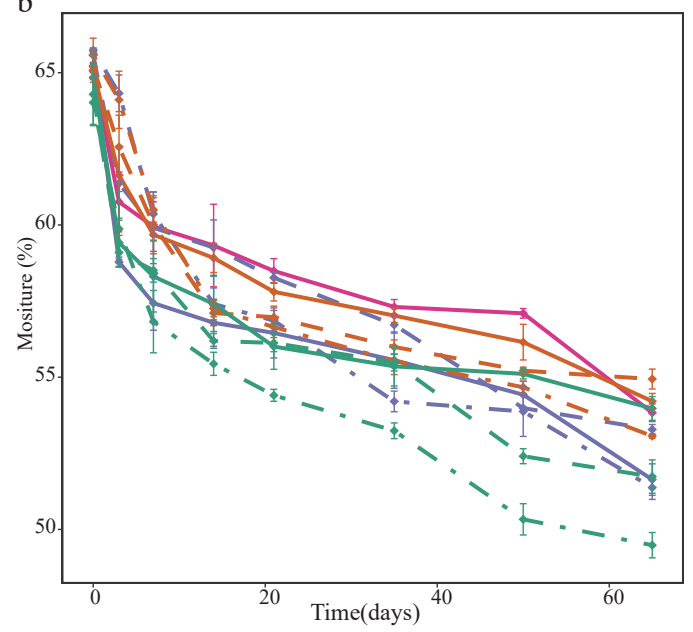

Supplement: Supplementary file 1 [file 5e0729aeb8b44976d86c7758.pdf]
